# Supplementary material for: Kinase-interacting substrate screening is a novel method to identify kinase substrates
Source: PubMed Central journal article supplement — J Cell Biol. 2015 Jun 22;209(6):895–912. doi: 10.1083/jcb.201412008 (PMC4477863; doi:10.1083/jcb.201412008), 2015-06-22
Supplement: supp_jcb.201412008_JCB_201412008_sm.pdf [file supp_jcb.201412008_JCB_201412008_sm.pdf]

Amano et al., <http://www.jcb.org/cgi/content/full/jcb.2014.12008/DC1>

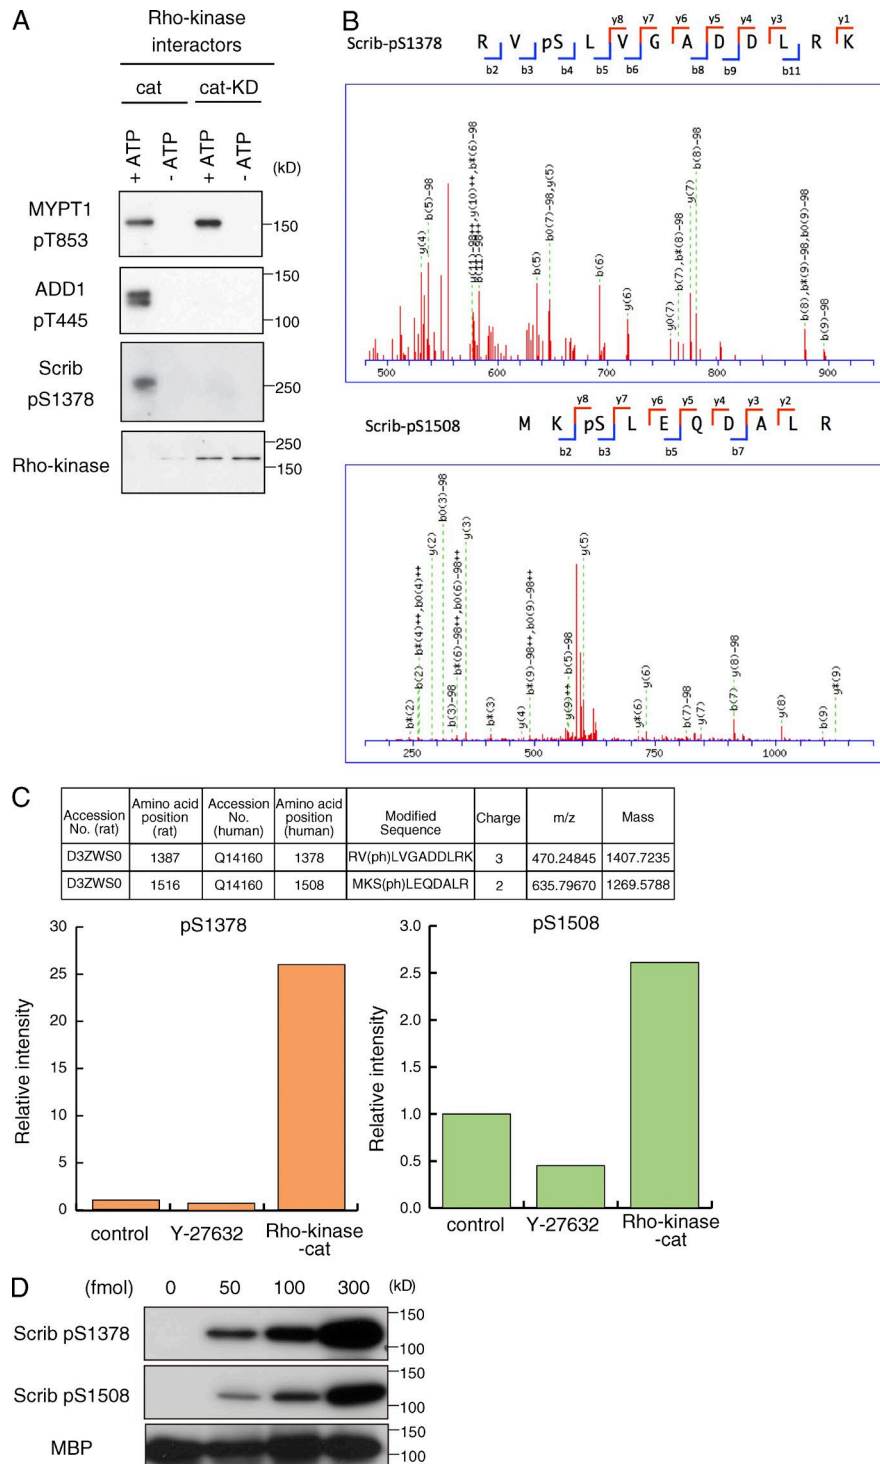

Figure S1. **Phosphorylation of Scrib at Ser 1378 and Ser 1508 by Rho-kinase.** (A) The phosphorylation levels of substrates complexed with Rho-kinase-cat or Rho-kinase-cat-KD. After the formation of the kinase-substrate complexes, they were incubated in the presence or absence of ATP. The phosphorylation at MYPT1-pT853, ADD1-pT445, and Scrib-pS1378 and endogenous Rho-kinase associated with beads were examined by immunoblot analyses. (B) The representative MS/MS spectra of Scrib peptides with pS1378 and pS1508. The data shown are from a single representative experiment out of four independent experiments. (C) Semiquantification of phosphopeptides containing pS1378 and pS1508 of Scrib in COS-7 cells. GST-Scrib was expressed in COS-7 cells, precipitated, and analyzed by LC/MS/MS after tryptic digestion. The intensities of precursor ion for phosphopeptide containing pS1378 (RVpSLVGADDLRK) and that containing pS1508 (MKpSLEQDALR) were measured from LC/MS/MS raw data by PinPoint software. The peak intensities of phosphopeptides were normalized by the averages of six peptides (LPDGFTQLR, LVCLDVSENR, GLGFSIAGGK, AGDAGIFVSR, ALAAVPSAGSVQR, and YFELEVR) derived from Scrib. The intensities of both phosphopeptides were diminished in the Y-27632-treated cells and elevated in the cells coexpressing constitutively active Rho-kinase. The data shown are from a single representative experiment out of two independent experiments. (D) Specificity of the antibodies against Scrib phosphorylated at Ser 1378 (anti-pS1378 antibody) and at Ser 1508 (anti-pS1508 antibody). 1 pmol of purified MBP-Scrib-C containing the indicated amounts of phosphorylated MBP-Scrib-C was subjected to SDS-PAGE, followed by immunoblot analysis with anti-pS1378 antibody (top), anti-pS1508 antibody (middle), or anti-MBP antibody (bottom).

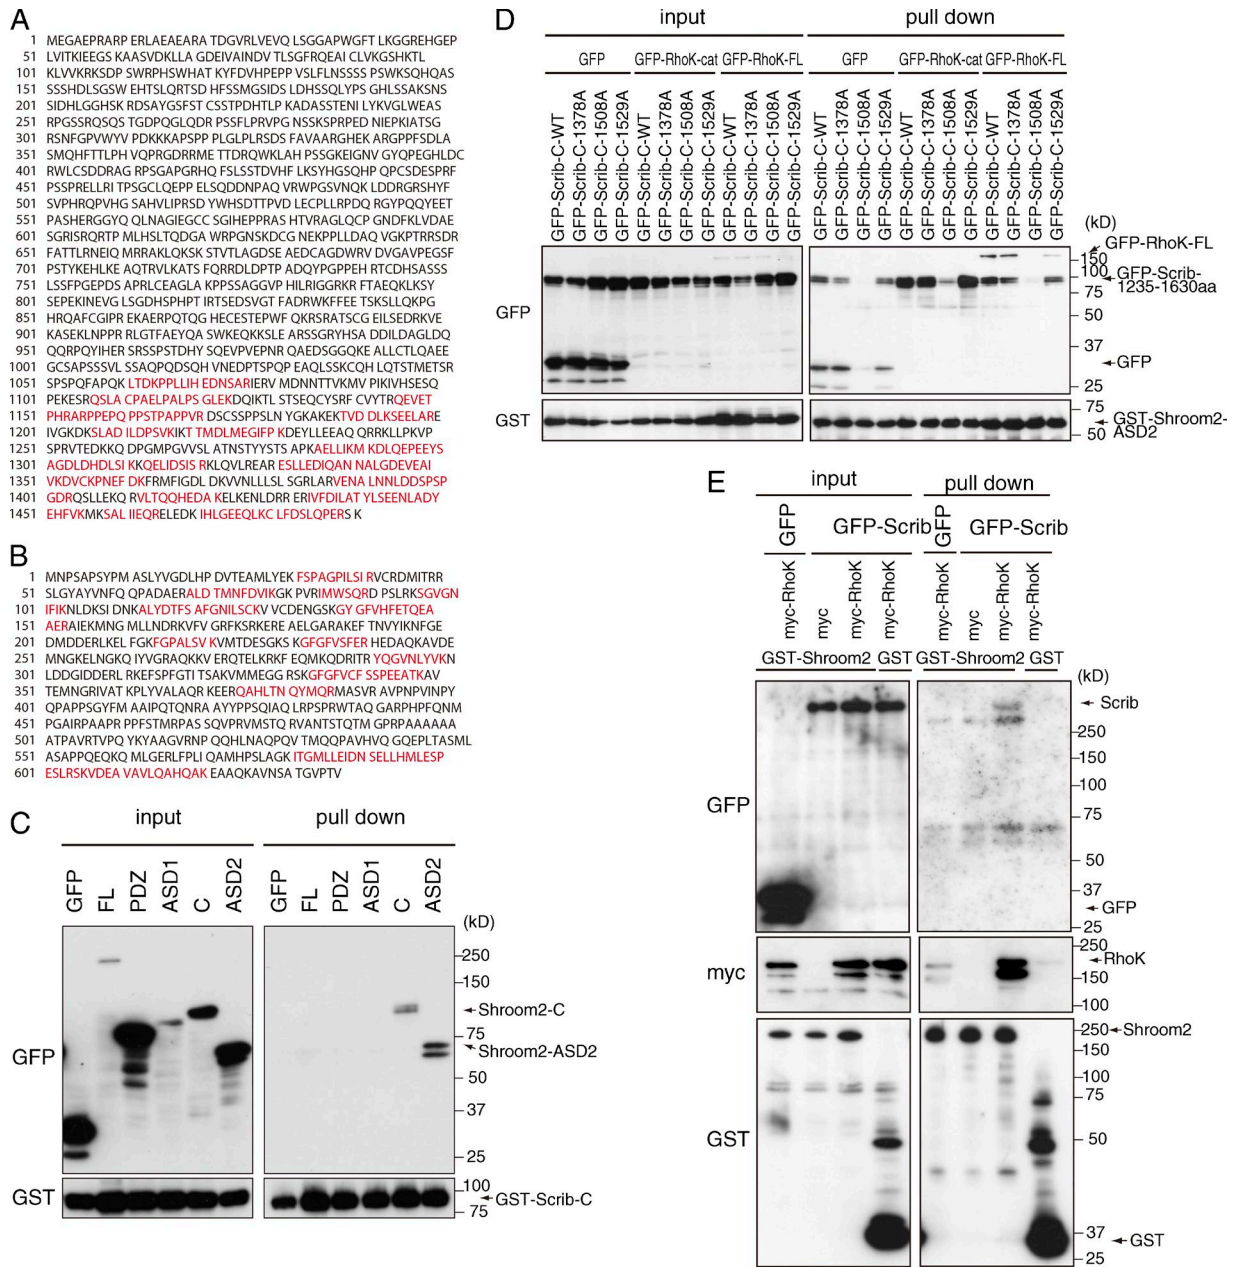

Figure S2. **Shroom2 as a novel interactor with Scrib.** (A and B) GST, phosphorylated GST-Scrib-C, or nonphosphorylated GST-Scrib-C immobilized on glutathione Sepharose beads was incubated with rat brain lysate. After washing, the bound proteins were eluted with 1 M NaCl. The eluates with 1 M NaCl and the remaining proteins on beads were separately subjected to tryptic digestion and the following LC/MS/MS analyses. Peptides derived from Shroom2 and Pabpc1 were preferentially detected in the samples of phosphorylated GST-Scrib-C. Matched peptides with Shroom2 and Pabpc1 are shown in red in A and B, respectively. (C) Various Shroom2 fragments fused with GFP were expressed with GST-Scrib-C in COS-7 cells, and GST-Scrib-C was precipitated with glutathione Sepharose beads. Precipitates were analyzed by immunoblot analysis with anti-GFP and anti-GST antibodies. (D) GFP-Scrib-C WT or mutants at phosphorylation sites were expressed with GST-Shroom2-ASD2 and/or GFP-Rho-kinase in COS-7 cells, and GST-Shroom2-ASD2 was precipitated with glutathione Sepharose beads. Precipitates were analyzed by immunoblot analysis with anti-GFP and anti-GST antibodies. (E) Ternary complex formation of Scrib-Shroom2-Rho-kinase. GFP-Scrib and myc-Rho-kinase were coexpressed with GST or GST-Shroom2 in COS-7 cells, and GST or GST-Shroom2 was precipitated with glutathione Sepharose beads. Precipitates were analyzed by immunoblot analysis with anti-GFP, anti-myc, and anti-GST antibodies.

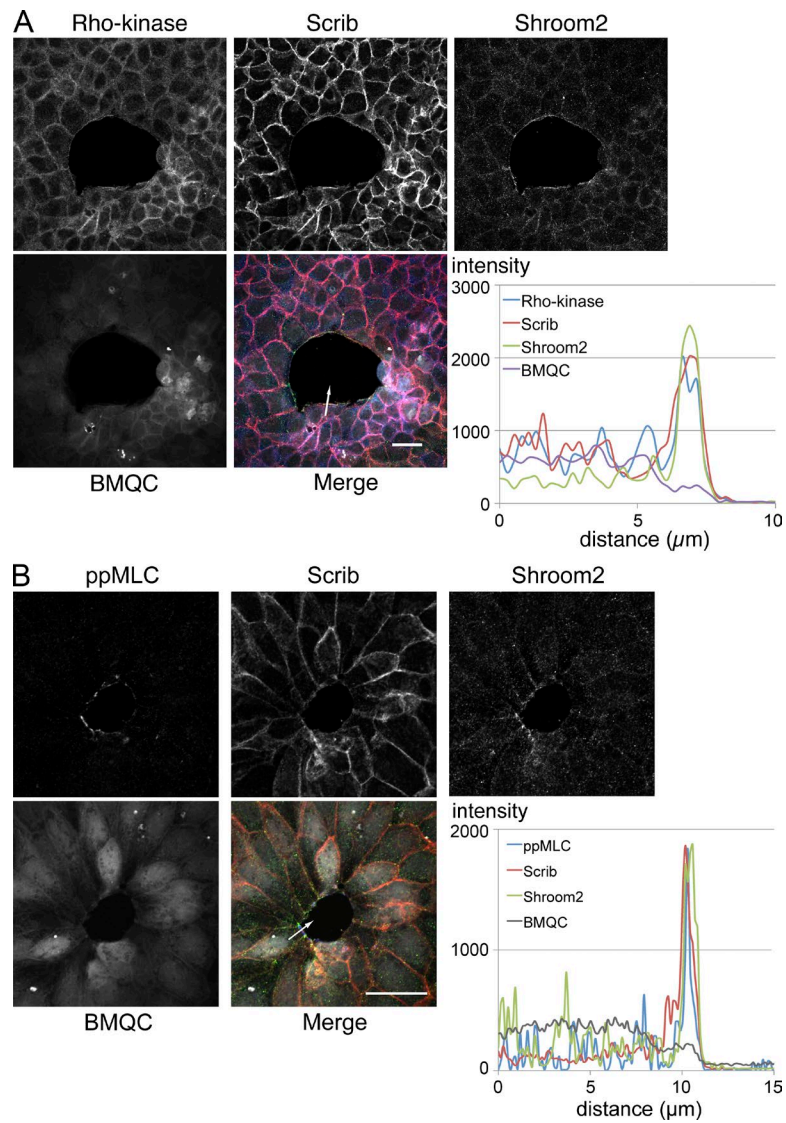

Figure S3. **Colocalization of Scrib with Shroom2, Rho-kinase, and ppMLC at the edge during wound hole closure.** Endogenous Rho-kinase (blue), Scrib (red), and Shroom2 (green; A) or ppMLC (blue), Scrib (red), and Shroom2 (green; B) were immunostained with the cytosolic marker CellTracker Violet BMQC in MDCK II cells. Intensities of all the fluorescence along the white arrows are shown. Bars, 20  $\mu\text{m}$ . The data shown are from a single representative experiment out of at least three independent experiments.

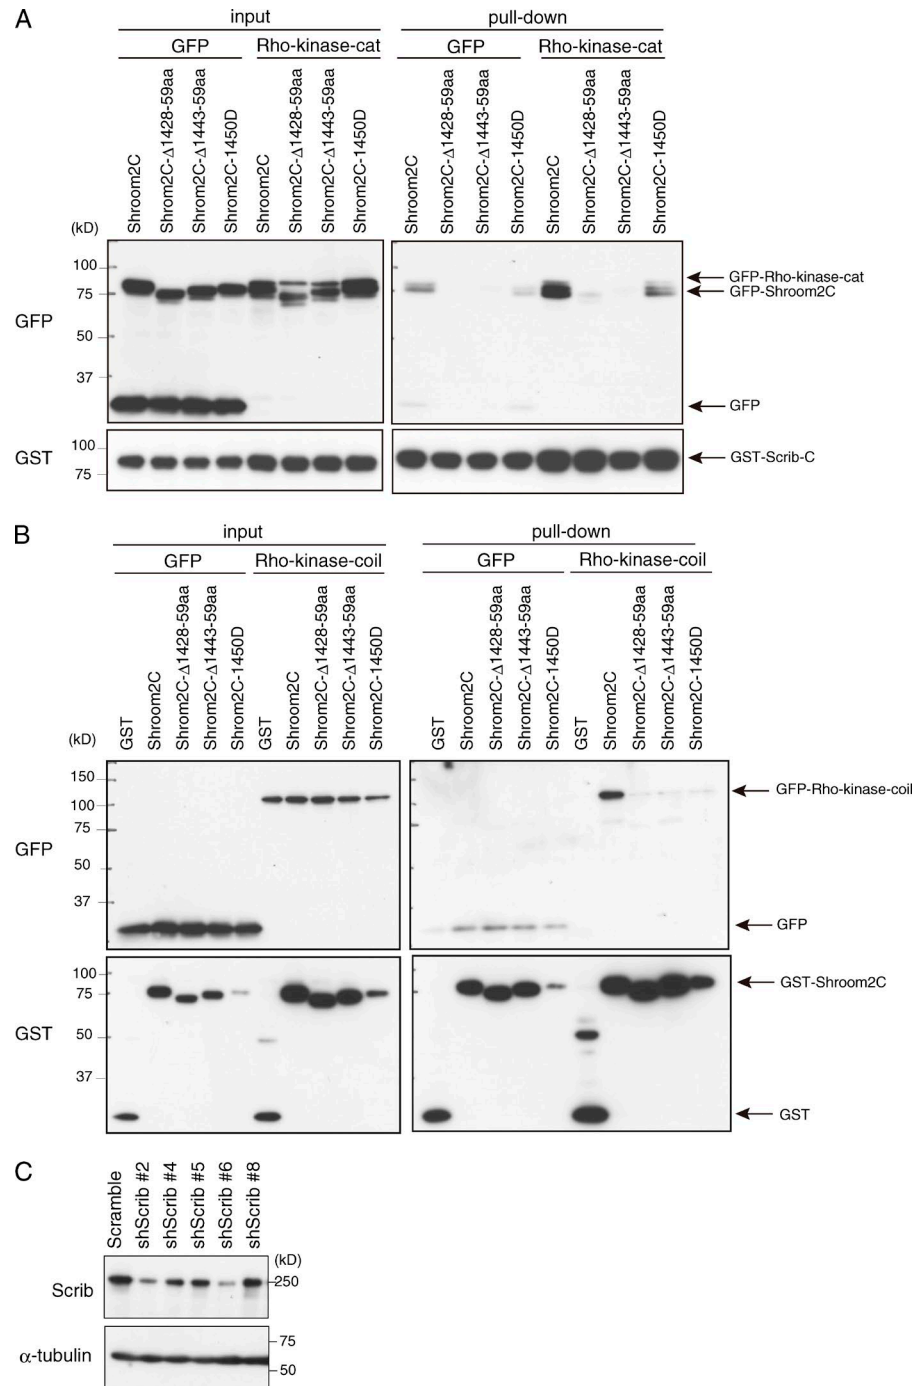

Figure S4. **Shroom2 mutants lacking the binding abilities against Scrib and Rho-kinase.** (A) Shroom2-C or Shroom2-C mutant fused with GFP was co-expressed with GST-Scrib-C in COS-7 cells and/or GFP-Rho-kinase-cat, and GST-Scrib-C was precipitated with glutathione Sepharose beads. Precipitates were analyzed with anti-GFP and anti-GST antibodies. (B) Shroom2-C or Shroom2-C mutant tagged with GST was coexpressed with GFP or GFP-Rho-kinase-coil (residues 421–1,137) in COS-7 cells, and GST-Shroom2-C was precipitated with glutathione Sepharose beads. Precipitates were analyzed with anti-GFP and anti-GST antibodies. (C) shRNA against Scrib was transfected into MDCK II cells, and cell lysates were subjected to immunoblot with anti-Scrib and anti- $\alpha$ -tubulin antibodies.

Table S1. Interactors with the C terminus of Scrib phosphorylated by Rho-kinase

|                                    | GST                              |    | GST-Scrib-C |   |
|------------------------------------|----------------------------------|----|-------------|---|
| <b>Rho-kinase</b>                  | +                                | +  | +           | - |
| <b>ATP</b>                         | +                                | +  | -           | - |
| <b>Accession number, gene name</b> | <b>Number of unique peptides</b> |    |             |   |
| D4A053, Shroom2                    | 0                                | 20 | 3           | 0 |
| P29341, Pabpc1                     | 0                                | 13 | 2           | 4 |

Table S2. Plasmids used in this study

| Plasmid name                             | Features                                                     | Insert (Protein)                                               | Parental vector |
|------------------------------------------|--------------------------------------------------------------|----------------------------------------------------------------|-----------------|
| pEF-BOS-GST                              | Mammalian expression vector, EF-1 $\alpha$ promoter, GST tag | –                                                              | pEF-BOS         |
| pEF-BOS-GST-CaMKK2                       | Mammalian expression vector, EF-1 $\alpha$ promoter, GST tag | human CaMKK2, NP_757380, 1–541 aa                              | pEF-BOS         |
| pEF-BOS-GSTCDC42EP4                      | Mammalian expression vector, EF-1 $\alpha$ promoter, GST tag | human CDC42EP4, NP_036253.2, 1–356 aa                          | pEF-BOS         |
| pEF-BOS-GST-EPB49 pEF-BOS-GST            | Mammalian expression vector, EF-1 $\alpha$ promoter, GST tag | human EPB49 variant, Q08495-3, 1–358 aa ( $\Delta$ 58–72 aa)   | pEF-BOS         |
| pEF-BOS-GST-FGFR1OP2                     | Mammalian expression vector, EF-1 $\alpha$ promoter, GST tag | human FGFR1OP2, Q9NVK5-2, 1–215 aa                             | pEF-BOS         |
| pEF-BOS-GST-LASP1                        | Mammalian expression vector, EF-1 $\alpha$ promoter, GST tag | human LASP1, NP_006139.1, 1–261 aa                             | pEF-BOS         |
| pEF-BOS-GST-HSP90a                       | Mammalian expression vector, EF-1 $\alpha$ promoter, GST tag | human HSP90a, P07900, 1–732 aa                                 | pEF-BOS         |
| pEF-BOS-GST-MPP2-N                       | Mammalian expression vector, EF-1 $\alpha$ promoter, GST tag | human MPP2, ABM82603, 1–218 aa                                 | pEF-BOS         |
| pEF-BOS-GST-MPP2-C                       | Mammalian expression vector, EF-1 $\alpha$ promoter, GST tag | human MPP2, ABM82603, 219–552 aa                               | pEF-BOS         |
| pEF-BOS-GST-MYO18A-N                     | Mammalian expression vector, EF-1 $\alpha$ promoter, GST tag | human MYO18A, KIAA0216, 1–363 aa                               | pEF-BOS         |
| pEF-BOS-GST-MYO18A-C                     | Mammalian expression vector, EF-1 $\alpha$ promoter, GST tag | human MYO18A, KIAA0216, 358–1,185 aa                           | pEF-BOS         |
| pEF-BOS-GST-Scrib                        | Mammalian expression vector, EF-1 $\alpha$ promoter, GST tag | human Scrib, NP_056171.2, 1–1,630 aa                           | pEF-BOS         |
| pEF-BOS-GST-SPTBN2-C                     | Mammalian expression vector, EF-1 $\alpha$ promoter, GST tag | human SPTBN2, KIAA0302, 1,905–2,390 aa                         | pEF-BOS         |
| pEF-BOS-GST-TWF2                         | Mammalian expression vector, EF-1 $\alpha$ promoter, GST tag | human TWF2 variant, NP_009215.1, 1–349 aa                      | pEF-BOS         |
| pEF-BOS-GST-MLC                          | Mammalian expression vector, EF-1 $\alpha$ promoter, GST tag | rat MLC, NP_080340, 1–172,aa                                   | pEF-BOS         |
| pEF-BOS-GST-Sctib-1-581aa                | Mammalian expression vector, EF-1 $\alpha$ promoter, GST tag | human Scrib, NP_056171.2, 1–581,aa                             | pEF-BOS         |
| pEF-BOS-GST-Sctib-578-1239aa             | Mammalian expression vector, EF-1 $\alpha$ promoter, GST tag | human Scrib, NP_056171.2, 578–1,239,aa                         | pEF-BOS         |
| pEF-BOS-GST-Sctib-C                      | Mammalian expression vector, EF-1 $\alpha$ promoter, GST tag | human Scrib, NP_056171.2, 1,235–1,630 aa                       | pEF-BOS         |
| pEF-BOS-GST-Sctib-1235-1483aa            | Mammalian expression vector, EF-1 $\alpha$ promoter, GST tag | human Scrib, NP_056171.2, 1,235–1,483 aa                       | pEF-BOS         |
| pEF-BOS-GST-Sctib-1478-1630aa            | Mammalian expression vector, EF-1 $\alpha$ promoter, GST tag | human Scrib, NP_056171.2, 1,478–1,630 aa                       | pEF-BOS         |
| pEGFP-c1                                 | Mammalian expression vector, CMV promoter, GFP tag           | –                                                              | pEGFP-c1        |
| pEGFP-c1-Scrib                           | Mammalian expression vector, CMV promoter, GFP tag           | human Scrib, NP_056171.2, 1–1,630 aa                           | pEGFP-c1        |
| pEGFP-c1-Scrib-C                         | Mammalian expression vector, CMV promoter, GFP tag           | human Scrib, NP_056171.2, 1,235–1,630 aa                       | pEGFP-c1        |
| pEGFP-c1-Scrib-1478-1630aa               | Mammalian expression vector, CMV promoter, GFP tag           | human Scrib, NP_056171.2, 1,478–1,630 aa                       | pEGFP-c1        |
| pMal-c2                                  | <i>E. coli</i> expression vector, tac promoter, MBP tag      | –                                                              | pMal-c2         |
| pMal-c2-Scrib-C                          | <i>E. coli</i> expression vector, tac promoter, MBP tag      | human Scrib, NP_056171.2, 1,235–1,630 aa                       | pMal-c2         |
| pGEX-2T                                  | <i>E. coli</i> expression vector, tac promoter, GST tag      | –                                                              | pGEX-2T         |
| pGEX-2T-Shroom2-ASD2                     | <i>E. coli</i> expression vector, tac promoter, GST tag      | human Shroom2, Q13796, 1,304–1,616 aa                          | pGEX-2T         |
| pEF-BOS-GST-Shroom2                      | Mammalian expression vector, EF-1 $\alpha$ promoter, GST tag | human Shroom2, Q13796, 1–1,616 aa                              | pEF-BOS-GST     |
| pEF-BOS-GST-Shroom2-ASD2                 | Mammalian expression vector, EF-1 $\alpha$ promoter, GST tag | human Shroom2, Q13796, 1,304–1,616 aa                          | pEF-BOS-GST     |
| pEGFP-c1-Shroom2                         | Mammalian expression vector, CMV promoter, GFP tag           | human Shroom2, Q13796, 1–1,616 aa                              | pEGFP-c1        |
| pEGFP-c1-Shroom2-PDZ                     | Mammalian expression vector, CMV promoter, GFP tag           | human Shroom2, Q13796, 1–485 aa                                | pEGFP-c1        |
| pEGFP-c1-Shroom2-ASD1                    | Mammalian expression vector, CMV promoter, GFP tag           | human Shroom2, Q13796, 480–981 aa                              | pEGFP-c1        |
| pEGFP-c1-Shroom2-C                       | Mammalian expression vector, CMV promoter, GFP tag           | human Shroom2, Q13796, 978–1,616 aa                            | pEGFP-c1        |
| pEGFP-c1-Shroom2-ASD2                    | Mammalian expression vector, CMV promoter, GFP tag           | human Shroom2, Q13796, 1,304–1,616 aa                          | pEGFP-c1        |
| pEGFP-c1-Shroom2-C- $\Delta$ 1428-1459aa | Mammalian expression vector, CMV promoter, GFP tag           | human Shroom2, Q13796, 978–1,616 aa ( $\Delta$ 1,428–1,459 aa) | pEGFP-c1        |
| pEGFP-c1-Shroom2-C- $\Delta$ 1443-1459aa | Mammalian expression vector, CMV promoter, GFP tag           | human Shroom2, Q13796, 978–1,616 aa ( $\Delta$ 1,443–1,459 aa) | pEGFP-c1        |
| pEGFP-c1-Shroom2- $\Delta$ 1428-1459aa   | Mammalian expression vector, CMV promoter, GFP tag           | human Shroom2, Q13796, 1–1,616 aa ( $\Delta$ 1,428–1,459 aa)   | pEGFP-c1        |
| pEGFP-c1-RhoA-L63                        | Mammalian expression vector, CMV promoter, GFP tag           | human RhoA, NP_001655, 1–193 aa                                | pEGFP-c1        |
| pEGFP-c1-Rho-kinase                      | Mammalian expression vector, CMV promoter, GFP tag           | bovine Rho-kinase, NP_776877, 1–1,388 aa                       | pEGFP-c1        |
| pEGFP-c1-Rho-kinase-cat                  | Mammalian expression vector, CMV promoter, GFP tag           | bovine Rho-kinase, NP_776877, 6–553 aa                         | pEGFP-c1        |
| pEF-BOS-myc-Rho-kinase                   | Mammalian expression vector, EF-1 $\alpha$ promoter, myc tag | bovine Rho-kinase, NP_776877, 1–1,388 aa                       | pEF-BOS         |
| pEF-BOS-myc-Rho-kinase-cat               | Mammalian expression vector, EF-1 $\alpha$ promoter, myc tag | bovine Rho-kinase, NP_776877, 6–553 aa                         | pEF-BOS         |
| pEF-BOS-myc-Rho-kinase-coil              | Mammalian expression vector, EF-1 $\alpha$ promoter, myc tag | bovine Rho-kinase, NP_776877, 421–1,137 aa                     | pEF-BOS         |
| pEF-BOS-HA-Rho-kinase-coil               | Mammalian expression vector, EF-1 $\alpha$ promoter, HA tag  | bovine Rho-kinase, NP_776877, 421–1,137 aa                     | pEF-BOS         |

**Table S3 shows the lists of candidate phosphorylation sites detected in the screens for the indicated kinases.**
